# Supplementary material for: Phase-separated super-enhancers confer an innate radioresistance on genomic DNA
Source: PubMed Central journal article supplement (PMC11262858; doi:10.1093/jrr/rrae044), 2024-06-14
Supplement: supplemental_imformation_rrae044.pdf [file supplemental_imformation_rrae044.pdf]

## Supplemental Figure S1

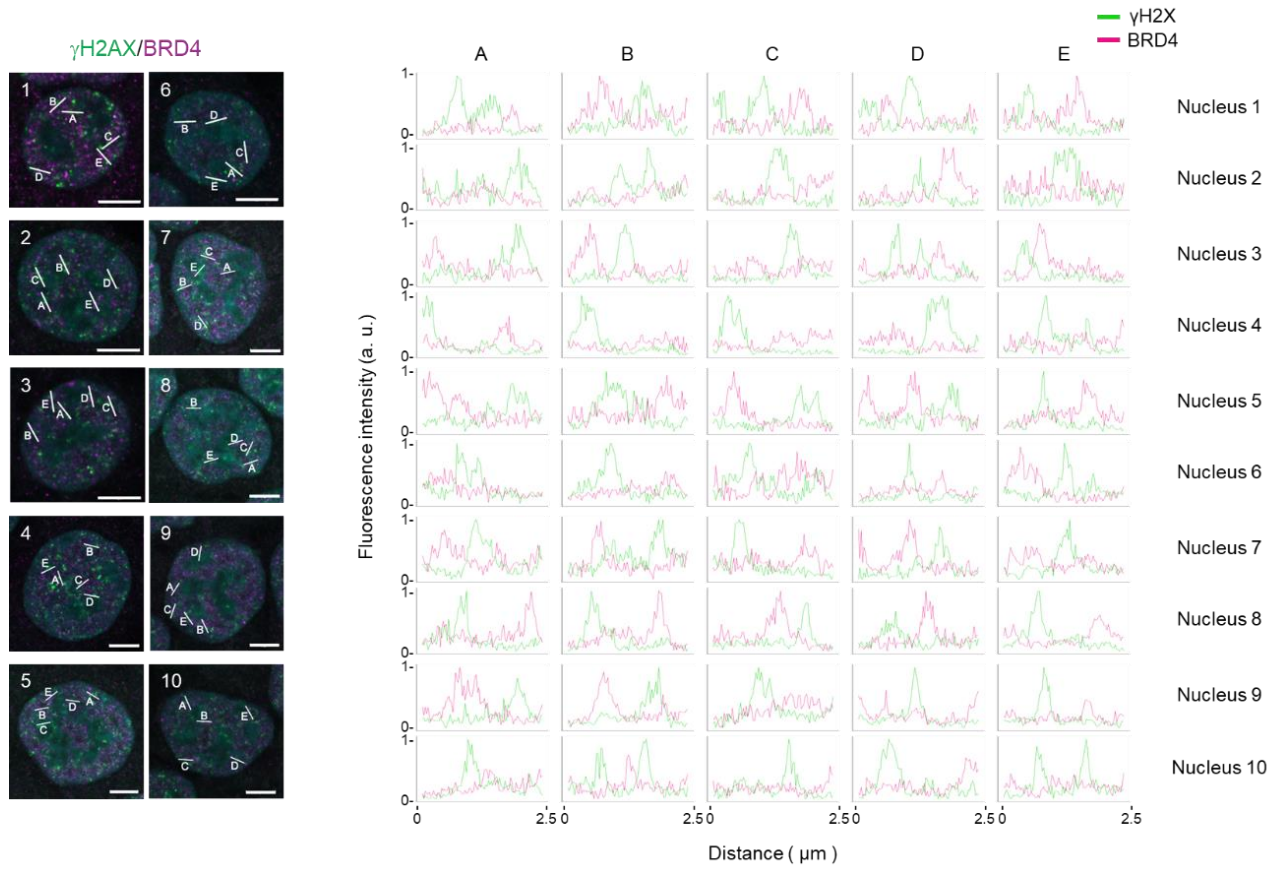

### Supplemental Fig. 1. The fluorescence intensity profiles of $\gamma$ H2AX and BRD4

Representative images of  $\gamma$ H2AX (green) and BRD4 (purple) at 30 min post 2Gy IR were shown in left. Bar = 5 $\mu$ m. The intensity profiles of each signal along an indicated line were shown in right.

Supplemental Figure S2

(A)

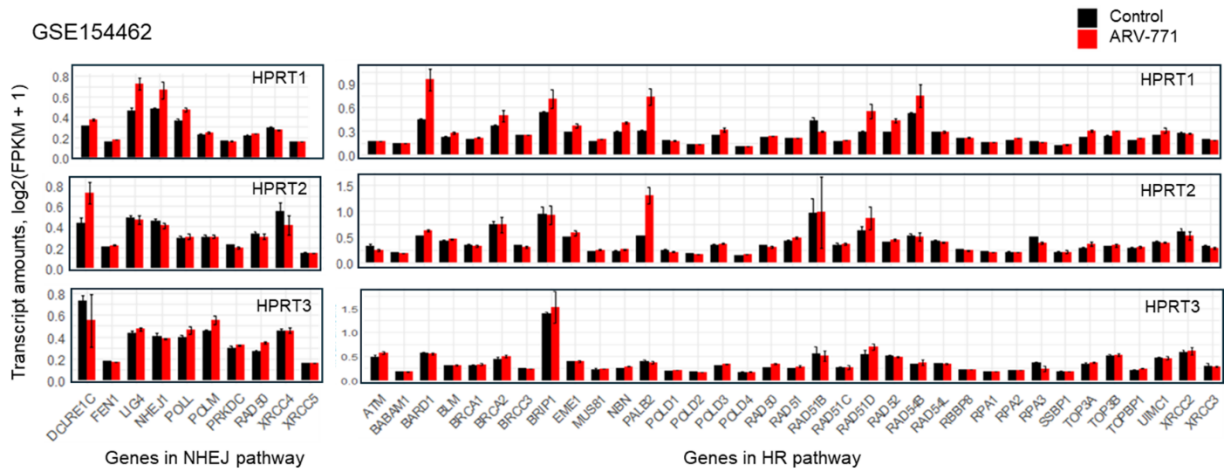

(B)

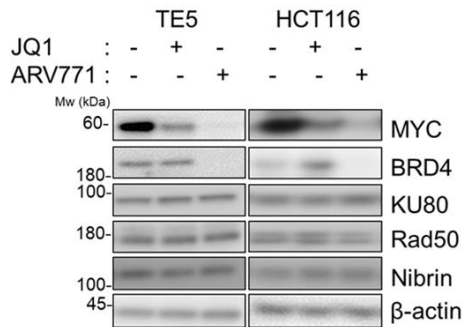

**Supplemental Fig. 2. The effects of ARV-771 on the expression levels of genes involved in DNA repair pathway.** (A) RNA-seq data from B-cell lymphoma cells (HPRT1, HPRT2, and HPRT3) treated with DMSO or ARV-771 was retrieved from GEO (GSE154462). (B) Western blot analysis of TE5 and HCT116 cells following JQ1 (100 nM, 8 h) and ARV771 (1  $\mu$ M, 8 h) treatment. Although the downregulation of MYC is prominent in both treatments, the protein levels of KU80, Rad50, and Nibrin as components of DNA damage response remain unchanged.

### Supplemental Figure S3

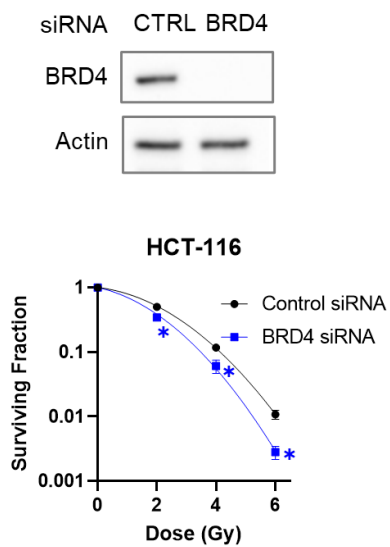

#### Supplemental Fig. 3. BRD4-silencing works as radiation sensitizer

Western blotting analysis of BRD4 upon siRNA mediated knock-down in HCT116 cell line (Upper). Survival fraction of HCT116 cell lines upon IR alone (Black) and IR combined with BRD4 silencing (Lower).
